# Supplementary material for: Three-component synthesis of 4H-pyran scaffolds accelerated by a gabapentin-based natural deep eutectic solvent
Source: Royal Society of Chemistry journal article supplement (doi:10.1039/d0nj05342b), 2021-01-01
Supplement: d0nj05342b1.pdf [file d0nj05342b1.pdf]

## Electronic Supplementary Information (ESI)

### New Journal of Chemistry

# Three-component synthesis of 4*H*-pyran scaffolds accelerated by a Gabapentin-based natural deep eutectic solvent

Meysam Alipour Khoshdel,<sup>a</sup> Farhad Shirini,<sup>\*a</sup> Mohaddeseh Safarpour Nikoo Langarudi,<sup>a</sup> Mehdi Zabihzadeh<sup>a</sup> and Mohammad Biglari<sup>a</sup>

*Department of Chemistry, College of Sciences, University of Guilan, Rasht, 41335-19141, Iran. E-mail: shirini@guilan.ac.ir; Fax: +98 131 3233262; Tel: +981313233262.*

|                                                                                                                                                          |    |
|----------------------------------------------------------------------------------------------------------------------------------------------------------|----|
| S 1: FT-IR spectrum of [Ch]Cl:Gab NADES.....                                                                                                             | 2  |
| S 2: Mass spectrum of the [Ch]Cl:Gab NADES. ....                                                                                                         | 3  |
| S 3: <sup>1</sup> H NMR spectrum of the [Ch]Cl:Gab NADES. ....                                                                                           | 4  |
| S 4: <sup>13</sup> C NMR spectrum of the [Ch]Cl:Gab NADES.....                                                                                           | 5  |
| S 5: FT-IR spectrum of 2-(2-Amino-3-cyano-7,7-dimethyl-5-oxo-5,6,7,8-tetrahydro-4H-chromen-4-yl)benzoic acid (4b). ...                                   | 6  |
| S 6: <sup>1</sup> H NMR spectrum of 2-(2-Amino-3-cyano-7,7-dimethyl-5-oxo-5,6,7,8-tetrahydro-4H-chromen-4-yl)benzoic acid (4b).<br>.....                 | 7  |
| S 7: <sup>13</sup> C NMR spectrum of 2-(2-Amino-3-cyano-7,7-dimethyl-5-oxo-5,6,7,8-tetrahydro-4H-chromen-4-yl)benzoic acid (4b).<br>.....                | 8  |
| S 8: FT-IR spectrum of 2-Amino-5-oxo-4-(pyridin-4-yl)-5,6,7,8-tetrahydro-4H-chromene-3-carbonitrile (4l). ....                                           | 9  |
| S 9: <sup>1</sup> H-NMR spectrum of 2-Amino-5-oxo-4-(pyridin-4-yl)-5,6,7,8-tetrahydro-4H-chromene-3-carbonitrile (4l). ....                              | 10 |
| S 10: <sup>13</sup> C-NMR spectrum of 2-Amino-5-oxo-4-(pyridin-4-yl)-5,6,7,8-tetrahydro-4H-chromene-3-carbonitrile (4l). ....                            | 11 |
| S 11: FT-IR spectrum of 7-Amino-5-(3-methoxyphenyl)-4-oxo-2-thioxo-1,3,4,5-tetrahydro-2H-pyrano[2,3-d]pyrimidine-6-carbonitrile (4x) .....               | 12 |
| S 12: <sup>1</sup> H-NMR spectrum of 7-Amino-5-(3-methoxyphenyl)-4-oxo-2-thioxo-1,3,4,5-tetrahydro-2H-pyrano[2,3-d]pyrimidine-6-carbonitrile (4x) .....  | 13 |
| S 13: <sup>13</sup> C-NMR spectrum of 7-Amino-5-(3-methoxyphenyl)-4-oxo-2-thioxo-1,3,4,5-tetrahydro-2H-pyrano[2,3-d]pyrimidine-6-carbonitrile (4x). .... | 14 |
| S 14: FT-IR spectrum of 7-Amino-5-(2-chlorophenyl)-4-oxo-2-thioxo-1,3,4,5-tetrahydro-2H-pyrano[2,3-d]pyrimidine-6-carbonitrile (4y). ....                | 15 |
| S 15: <sup>1</sup> H-NMR spectrum of 7-Amino-5-(2-chlorophenyl)-4-oxo-2-thioxo-1,3,4,5-tetrahydro-2H-pyrano[2,3-d]pyrimidine-6-carbonitrile (4y). ....   | 16 |
| S 16: <sup>13</sup> C-NMR spectrum of 7-Amino-5-(2-chlorophenyl)-4-oxo-2-thioxo-1,3,4,5-tetrahydro-2H-pyrano[2,3-d]pyrimidine-6-carbonitrile (4y). ....  | 17 |
| S 17: Plausible mechanism for the synthesis of 4 <i>H</i> -pyran derivatives in the presence of [Ch]Cl:Gab NADES. ....                                   | 18 |

**Spectral data for [Ch]Cl:Gab NADES :** White highly viscous liquid; M.P. 25 °C; MS:  $m/z = 311$  ( $M^+$ ); FT-IR (KBr,  $\text{cm}^{-1}$ )  $\nu_{\text{max}}$ : 3389, 3017, 2928, 2861, 2620, 2149, 1616, 1546, 1476, 1399, 1299, 1087, 953, 708, 618, 589;  $^1\text{H}$  NMR (400 MHz,  $\text{CDCl}_3\text{-}d_6$ ):  $\delta$  (ppm) 1.20-1.41 (m, H), 2.22 (s, 2H), 2.64 (s, 2H), 3.44 (t,  $j=4$  Hz, 2H), 3.8 2(q,  $j=4$  Hz, 2H), 4.00-5.00 (w, NH & OH);  $^{13}\text{C}$  NMR (100 MHz,  $\text{CDCl}_3\text{-}d_6$ ):  $\delta$ (ppm) 21.5, 22.8, 26.0, 34.1, 34.7, 36.6, 53.6, 55.5, 67.4, 175.1 (COO $^-$ ).

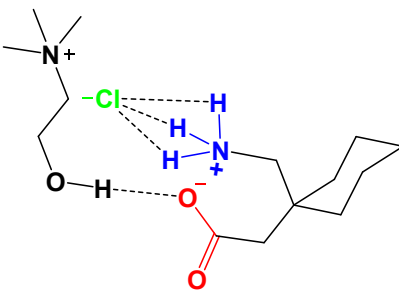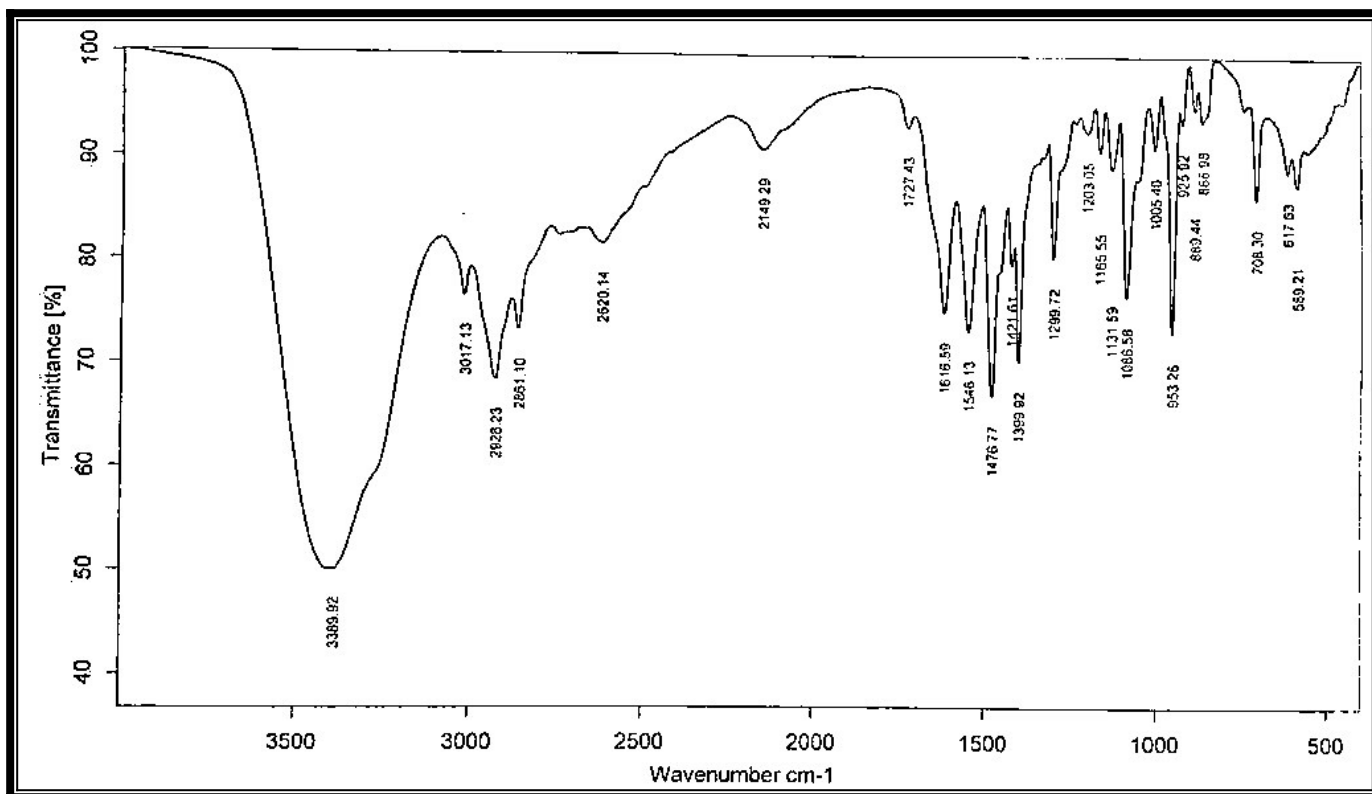

S 1: FT-IR spectrum of [Ch]Cl:Gab NADES.

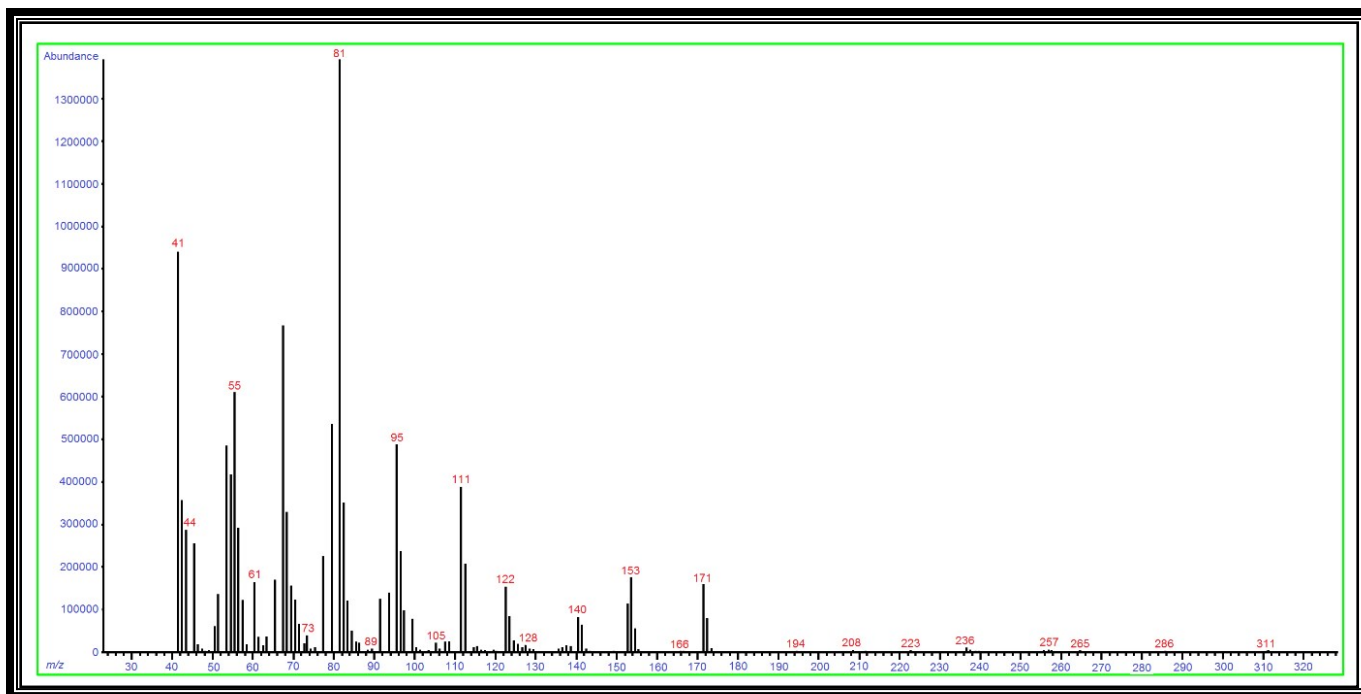

S 2: Mass spectrum of the [Ch]Cl:Gab NADES.

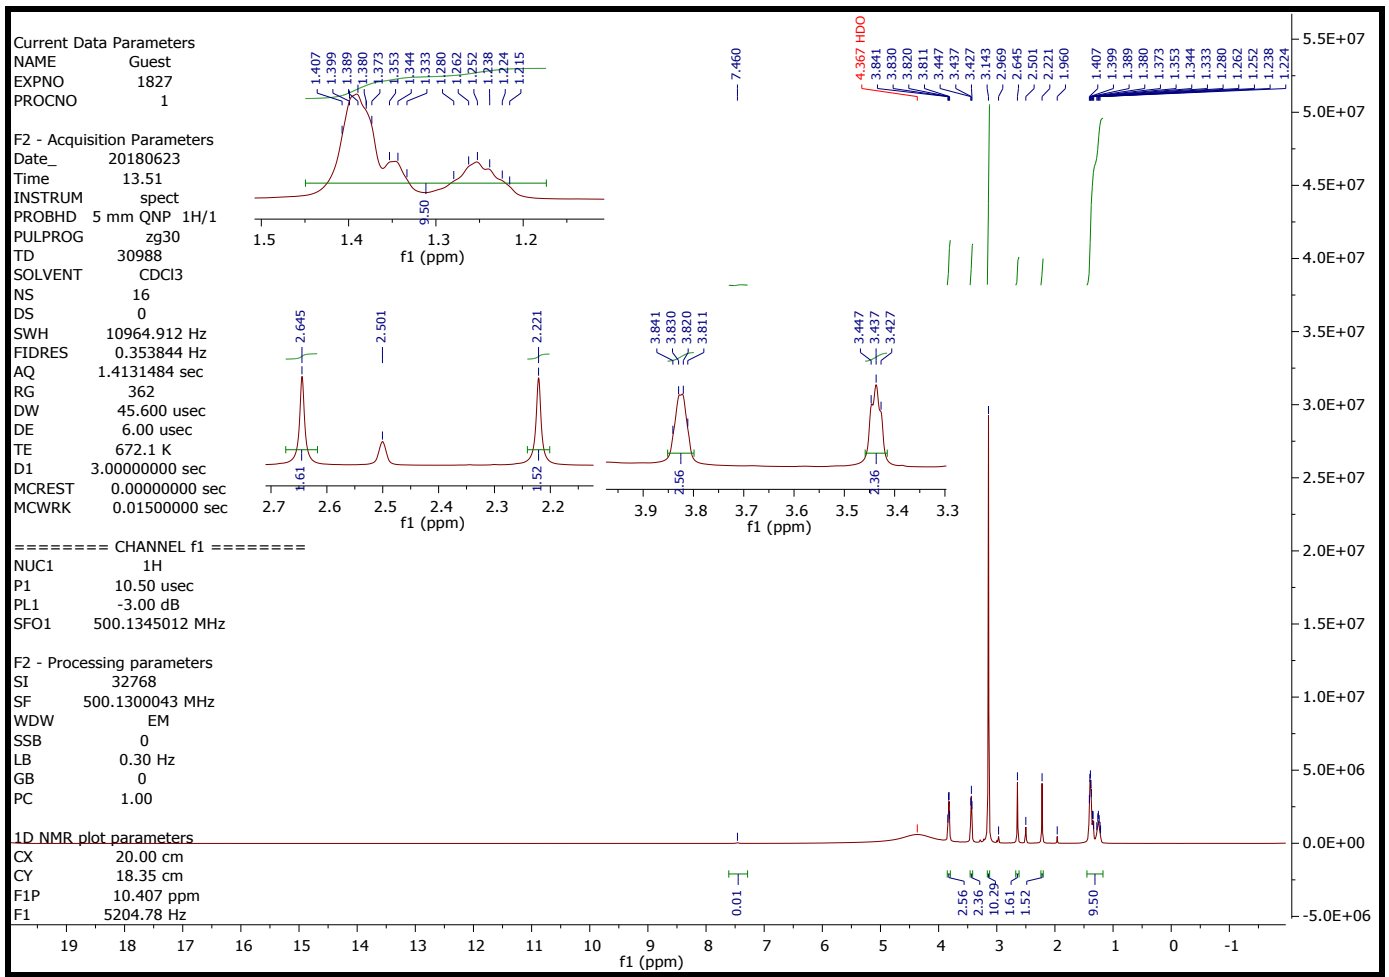

S 3:  $^1\text{H}$  NMR spectrum of the  $[\text{Ch}]\text{Cl}:\text{Gab}$  NADES.

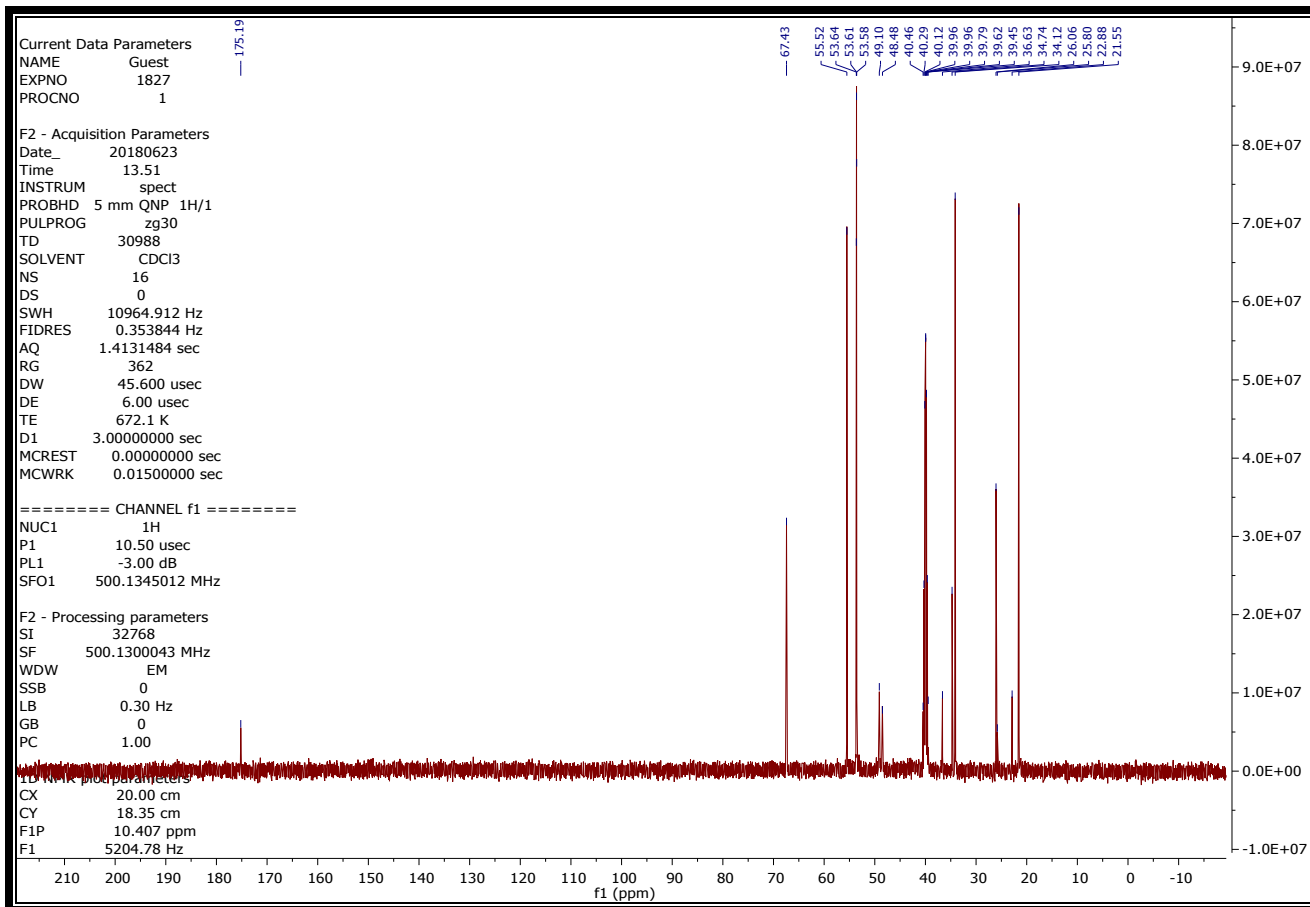

S 4:  $^{13}\text{C}$  NMR spectrum of the [Ch]Cl:Gab NADES.

**2-(2-Amino-3-cyano-7,7-dimethyl-5-oxo-5,6,7,8-tetrahydro-4H-chromen-4-yl)benzoic acid (4b).**

Yellow powder; yield 86%; M.P. 189-192 °C; FT-IR (KBr,  $\nu$ ,  $\text{cm}^{-1}$ ): 3466, 3421, 3328, 3212, 3179, 2960, 2931, 2196, 1716, 1687, 1594;  $^1\text{H}$  NMR (400 MHz,  $\text{DMSO-}d_6$ ):  $\delta$  (ppm) 0.94 (s, 3H,  $-\text{CH}_3$ ), 1.03 (s, 3H,  $-\text{CH}_3$ ), 2.04 (d,  $J=16$  Hz, 2H,  $-\text{CH}_2$ ), 2.21 (d,  $J=16$  Hz, 2H,  $-\text{CH}_2$ ), 5.57 (s, 1H,  $-\text{CH}$ ), 6.94 (brs, 2H,  $\text{NH}_2$ ), 7.17 (d,  $J=8$  Hz, 1H, CH-Py), 7.25 (t,  $J=8$  Hz, 1H, CH-Py), 7.48 (t,  $J=8$  Hz, 1H, CH-Py), 7.75 (d,  $J=8$  Hz, 1H, CH-Py), 12.81 (brs, 1H,  $\text{CO}_2\text{H}$ );  $^{13}\text{C}$  NMR (100 MHz,  $\text{DMSO-}d_6$ ):  $\delta$  (ppm) 27.3 & 28.7, 30.2, 32.3, 39.9, 50.3, 58.8, 113.7, 119.8, 126.6, 129.2, 130.1, 130.7, 132.3, 146.7, 159.1, 162.8, 168.8, 196.1.

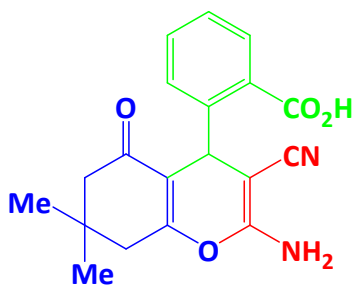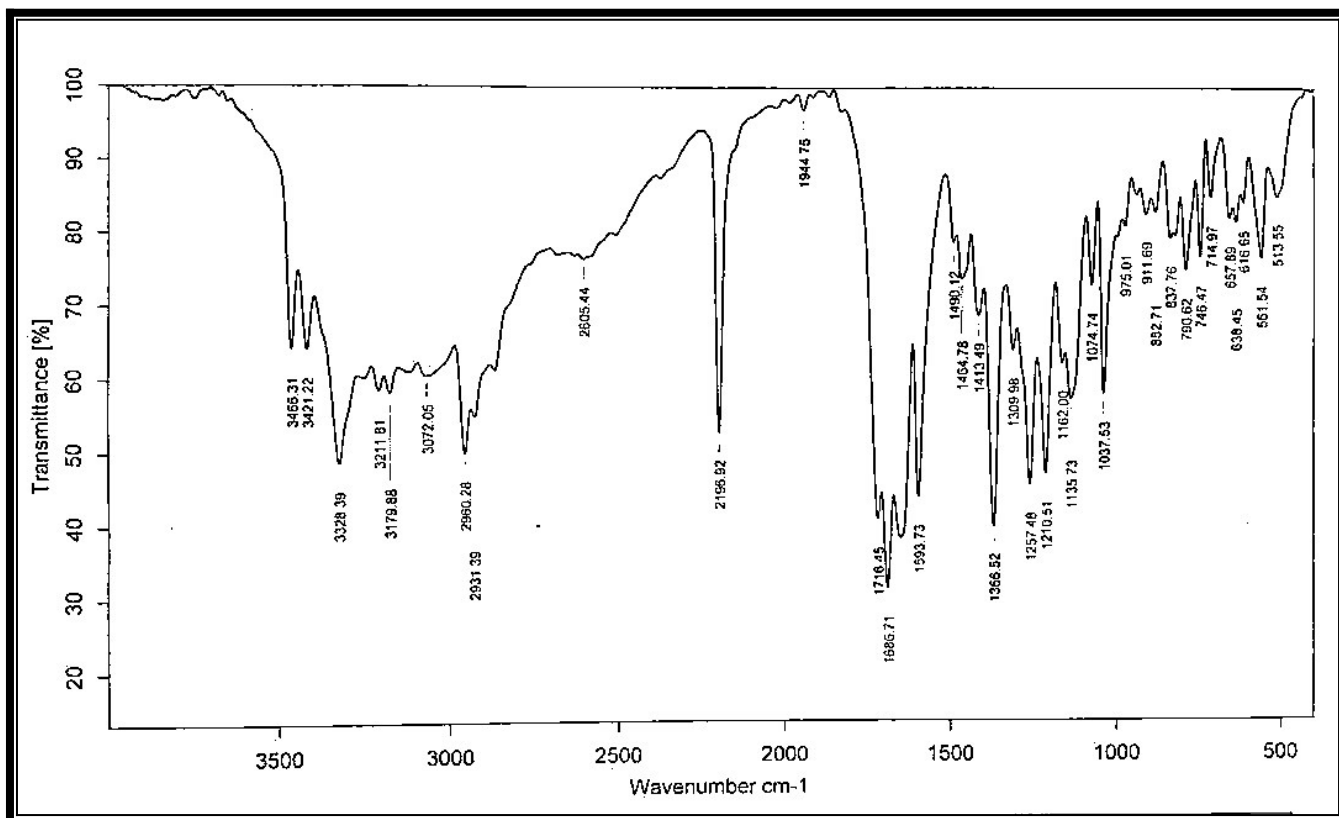

S 5: FT-IR spectrum of 2-(2-Amino-3-cyano-7,7-dimethyl-5-oxo-5,6,7,8-tetrahydro-4H-chromen-4-yl)benzoic acid (4b).

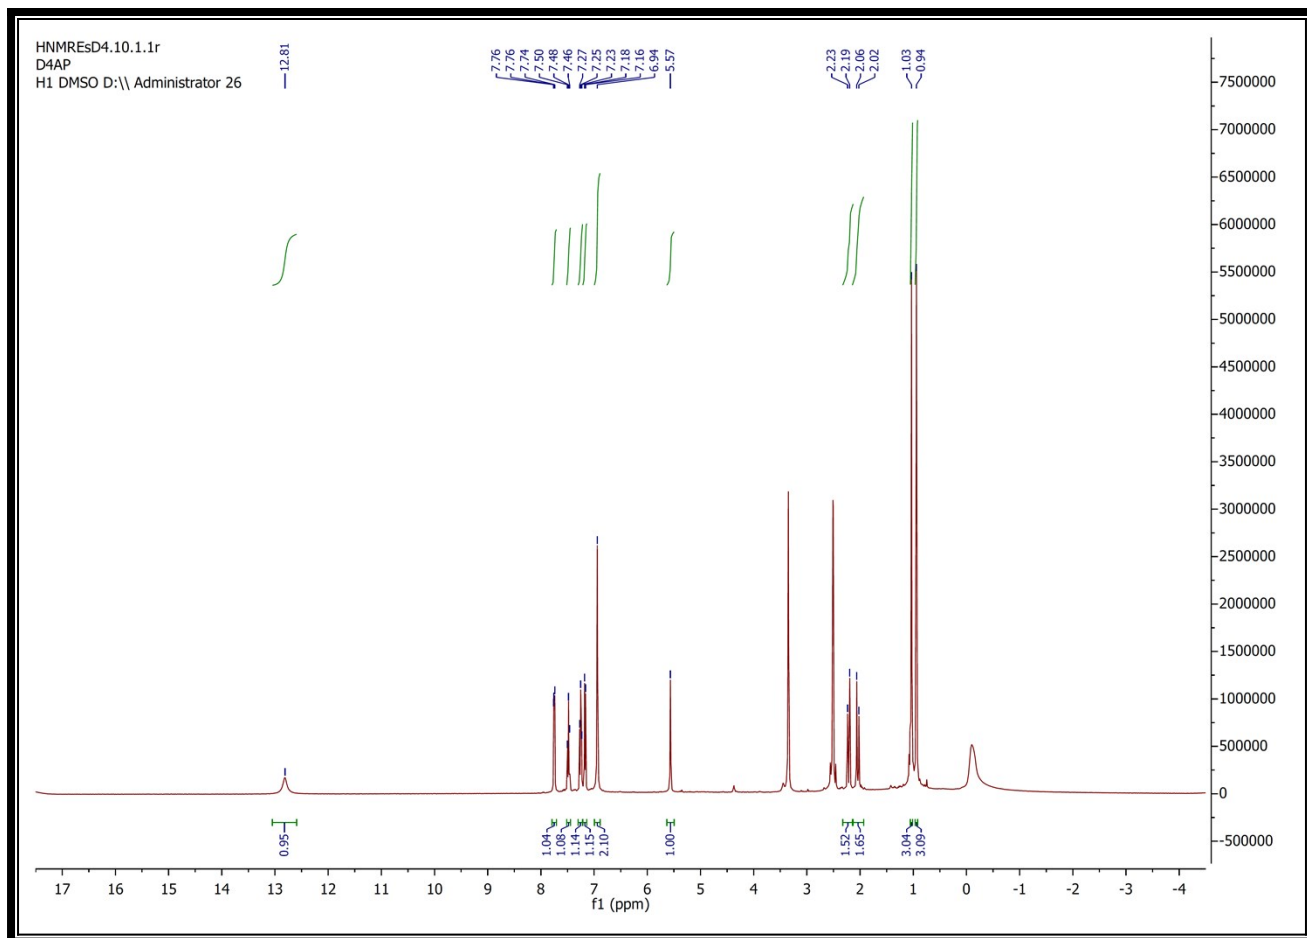

S 6:  $^1\text{H}$  NMR spectrum of 2-(2-Amino-3-cyano-7,7-dimethyl-5-oxo-5,6,7,8-tetrahydro-4H-chromen-4-yl)benzoic acid (4b).

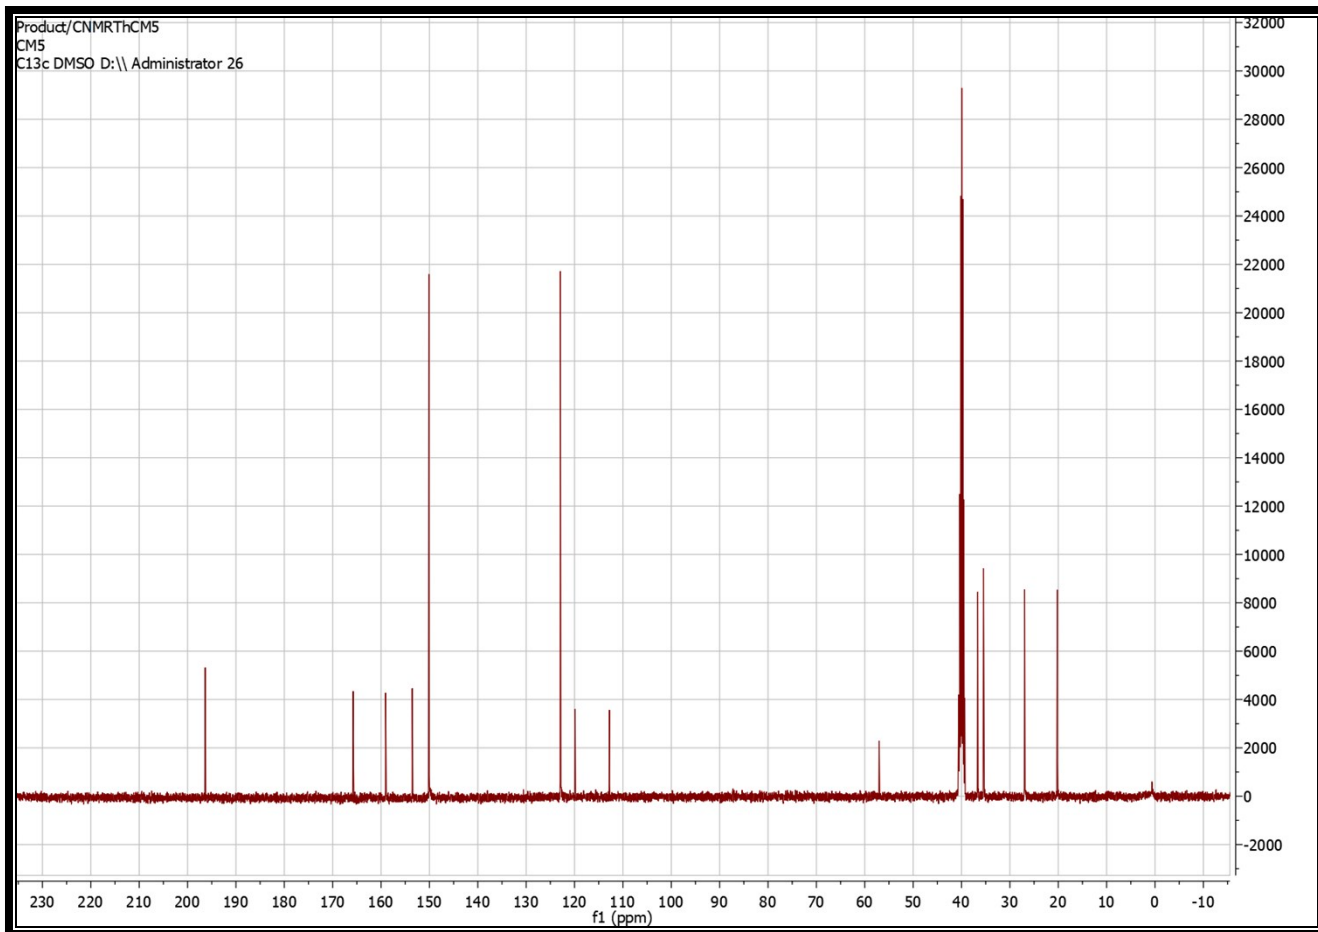

S 7: <sup>13</sup>C NMR spectrum of 2-(2-Amino-3-cyano-7,7-dimethyl-5-oxo-5,6,7,8-tetrahydro-4H-chromen-4-yl)benzoic acid (4b).



**2-Amino-5-oxo-4-(pyridin-4-yl)-5,6,7,8-tetrahydro-4H-chromene-3-carbonitrile (4l).**

White powder; yield 88%; M.P. 228-231 °C; FT-IR (KBr,  $\nu$ ,  $\text{cm}^{-1}$ ): 3301, 3310, 2950, 2893, 2199, 1659, 1597;  $^1\text{H}$  NMR (400 MHz,  $\text{DMSO-}d_6$ ):  $\delta$  (ppm) 1.96 (m, 2H,  $-\text{CH}_2$ ), 2.29 (m, 2H,  $-\text{CH}_2$ ), 2.64 (m, 2H,  $-\text{CH}_2$ ), 4.21(s, 1H,  $-\text{CH}$ ), 7.18 (brs, 2H,  $\text{NH}_2$ ), 7.20 (d,  $J_1=4.6$  Hz,  $J_2=1.6$  Hz 2H, CH-Py), 8.49 (d,  $J_1=4.4$  Hz,  $J_2=1.6$  Hz, 2H, CH-Py);  $^{13}\text{C}$  NMR (100 MHz,  $\text{DMSO-}d_6$ ):  $\delta$  (ppm) 20.2, 26.9, 35.4, 36.6, 57.0, 112.8, 119.8, 122.9, 150.1, 153.5, 159.0, 165.7, 196.3.

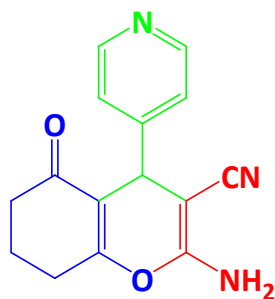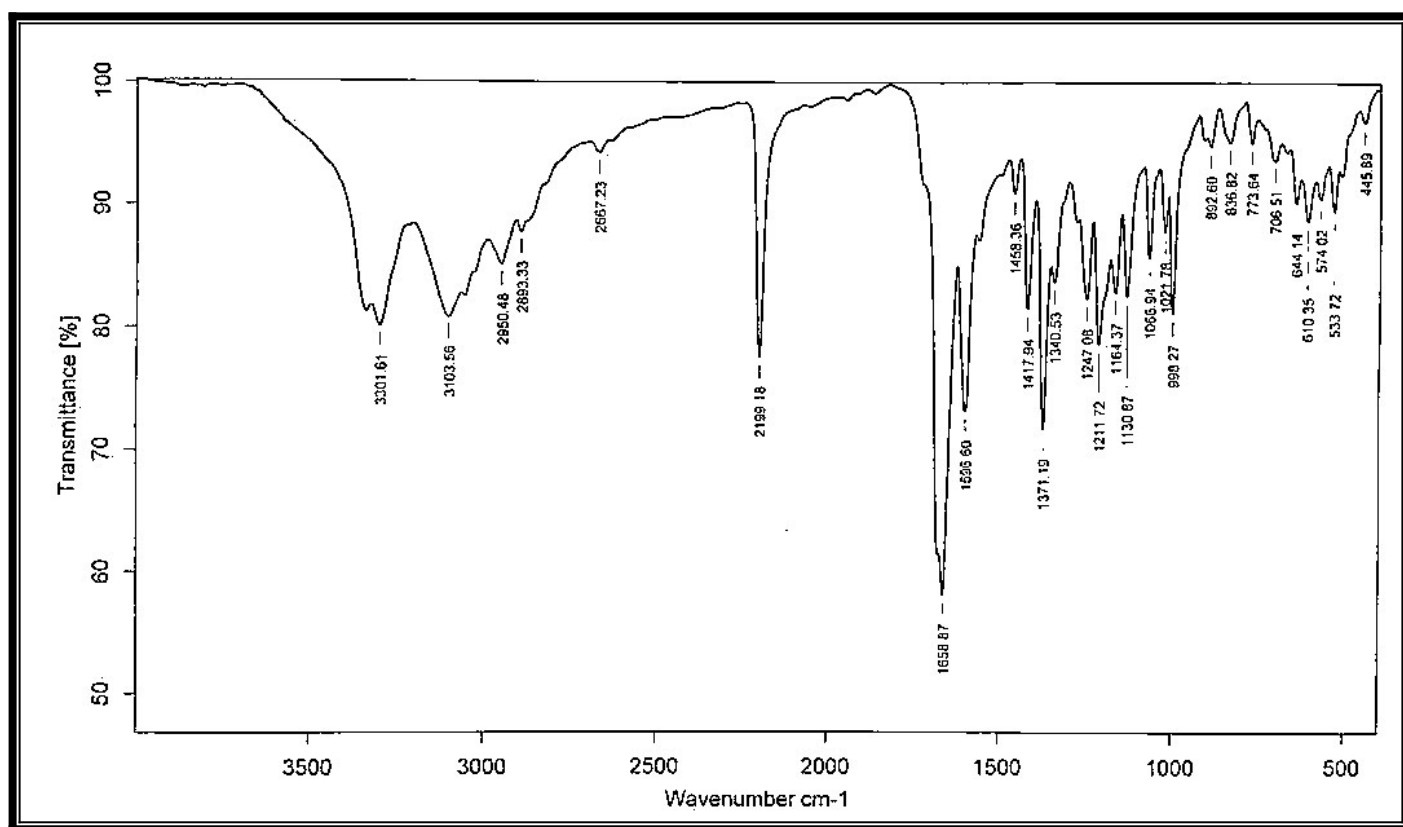

S 8: FT-IR spectrum of 2-Amino-5-oxo-4-(pyridin-4-yl)-5,6,7,8-tetrahydro-4H-chromene-3-carbonitrile (4l).



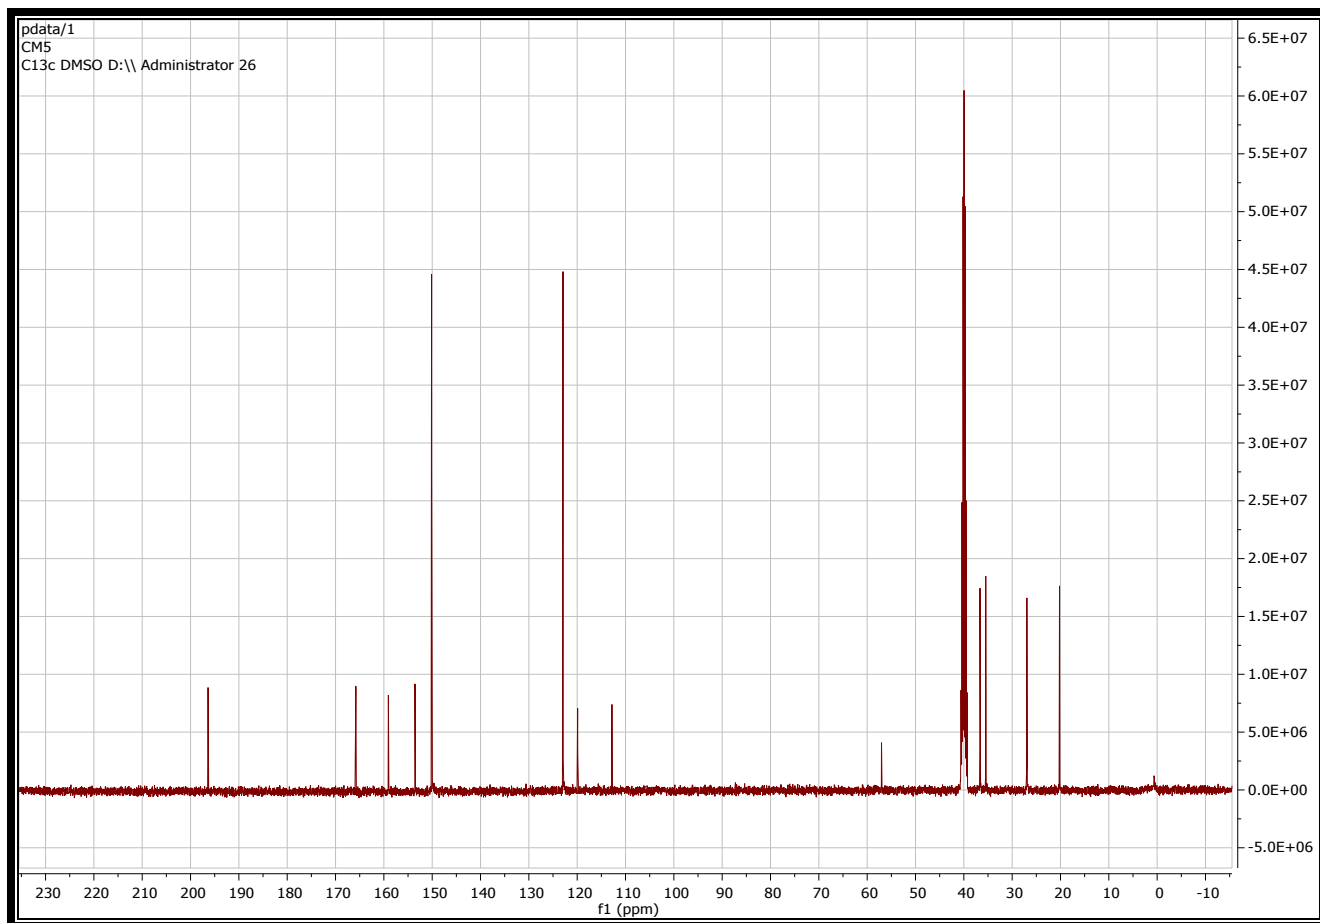

S 10:  $^{13}\text{C}$ -NMR spectrum of 2-Amino-5-oxo-4-(pyridin-4-yl)-5,6,7,8-tetrahydro-4H-chromene-3-carbonitrile (4l).

**7-Amino-5-(3-methoxyphenyl)-4-oxo-2-thioxo-1,3,4,5-tetrahydro-2H-pyrano[2,3-d]pyrimidine-6-carbonitrile (4x)**

White powder; yield 88%; M.P. 235-238 °C; FT-IR (KBr,  $\nu$ ,  $\text{cm}^{-1}$ ): 3414, 3312, 3185, 3065, 2195, 1677, 1567;  $^1\text{H}$  NMR (400 MHz,  $\text{DMSO-}d_6$ ):  $\delta$  (ppm) 3.73 (s, 3H,  $\text{CH}_3$ ), 4.23 (s, 1H, -CH), 6.76 (t,  $J = 2.4$  Hz, 1H, CH-Ph), 6.81 (dd,  $J_1=8.4$  Hz,  $J_2= 2.4$  Hz, 2H, CH-Ph), 7.17 (brs, 2H,  $\text{NH}_2$ ), 7.22 (t,  $J = 8$  Hz, 1H, CH-Ph), 12.45 (s, 1H, NH), 13.65 (brs, 1H, NH);  $^{13}\text{C}$  NMR (100 MHz,  $\text{DMSO-}d_6$ ):  $\delta$  (ppm) 35.5, 54.9, 93.3, 111.7, 113.6, 118.9, 119.5, 129.4, 145.0, 151.6, 157.3, 159.1, 160.0, 160.1, 173.7.

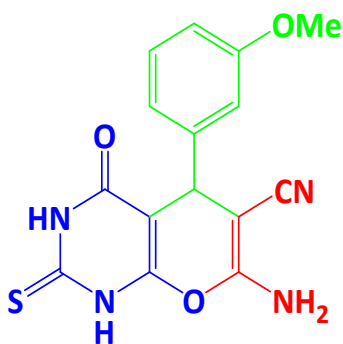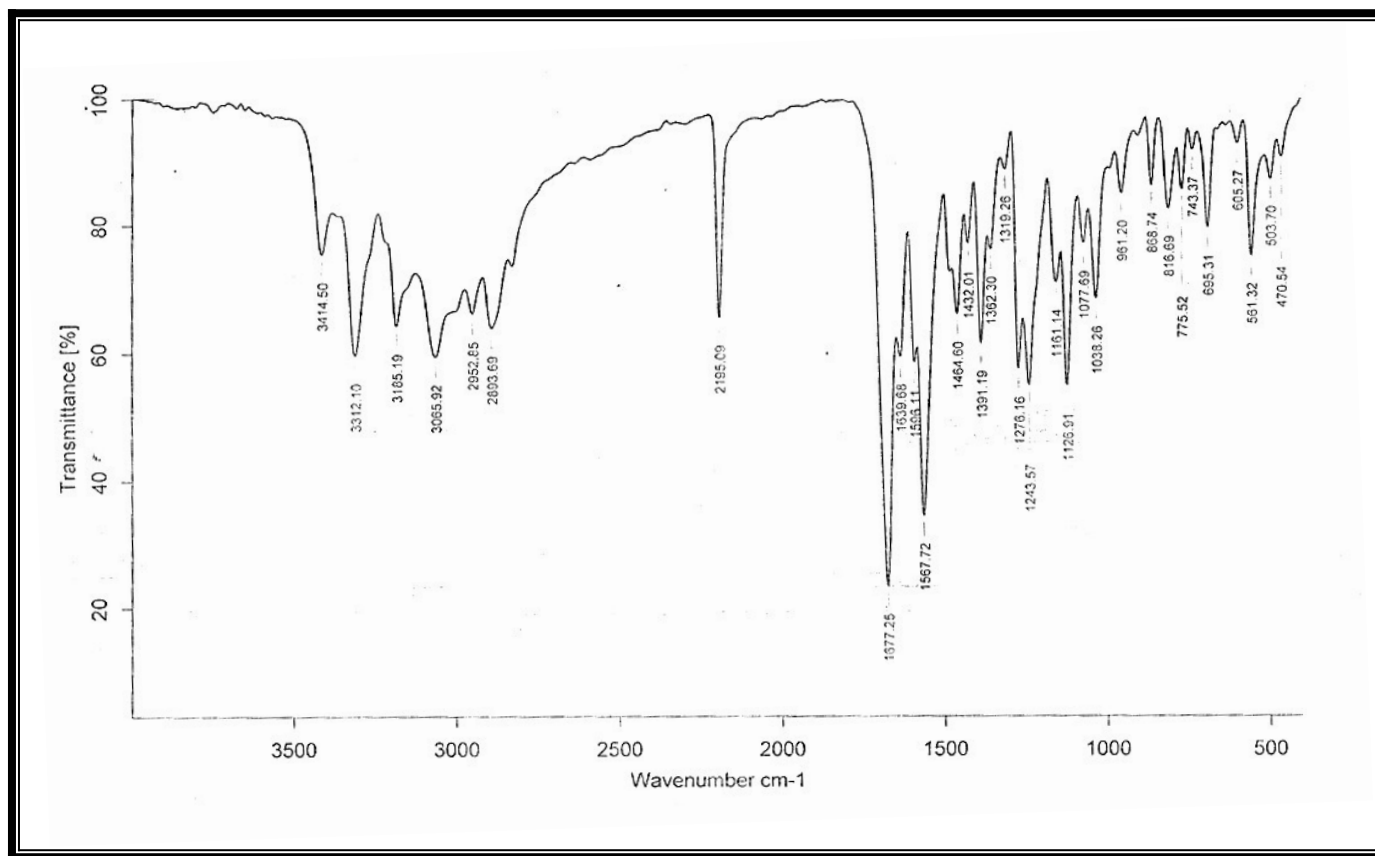

S 11: FT-IR spectrum of 7-Amino-5-(3-methoxyphenyl)-4-oxo-2-thioxo-1,3,4,5-tetrahydro-2H-pyrano[2,3-d]pyrimidine-6-carbonitrile

(4x)

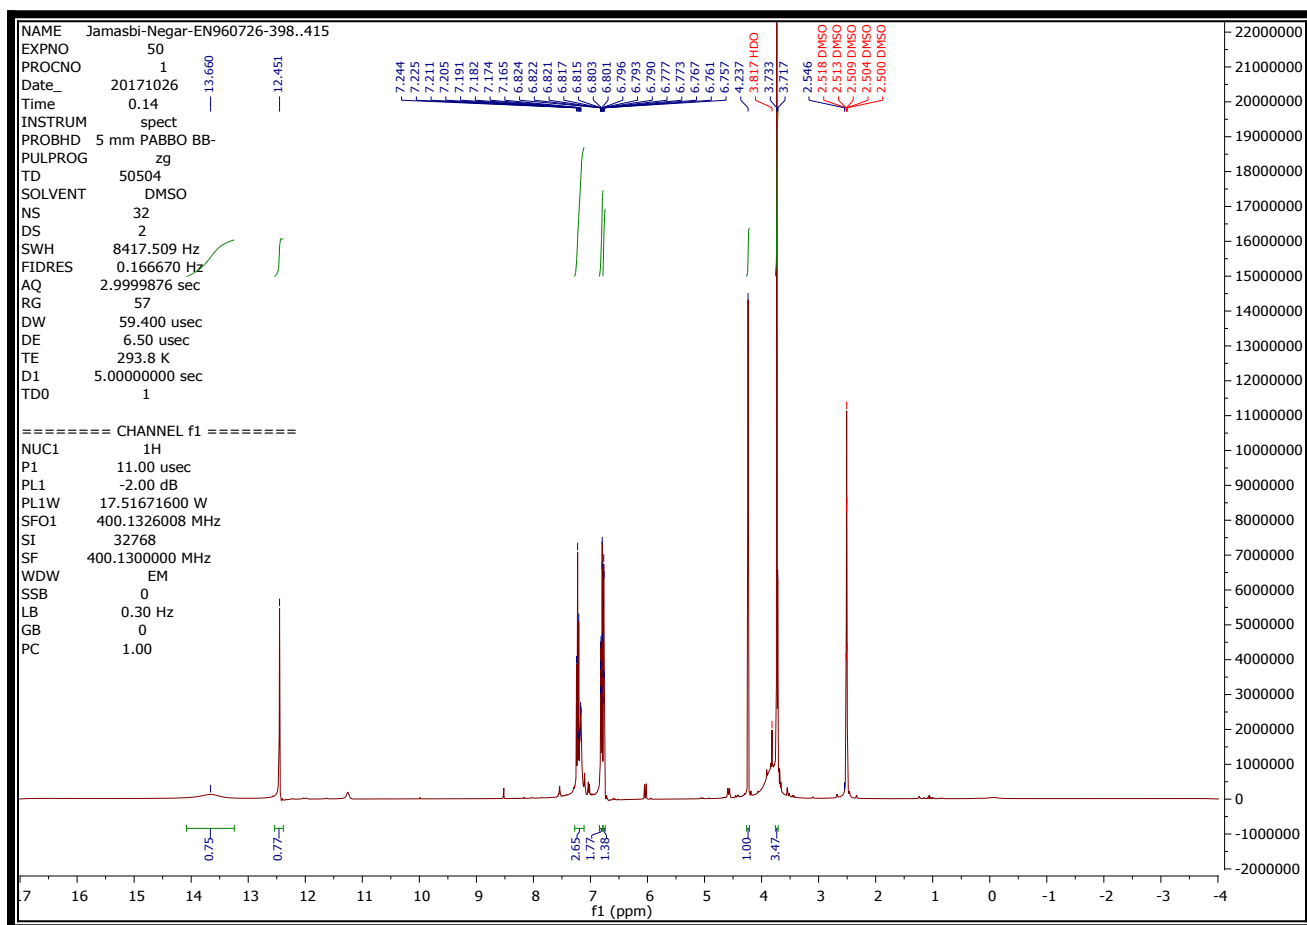

S 12:  $^1\text{H}$ -NMR spectrum of 7-Amino-5-(3-methoxyphenyl)-4-oxo-2-thioxo-1,3,4,5-tetrahydro-2H-pyrano[2,3-d]pyrimidine-6-carbonitrile (4x)

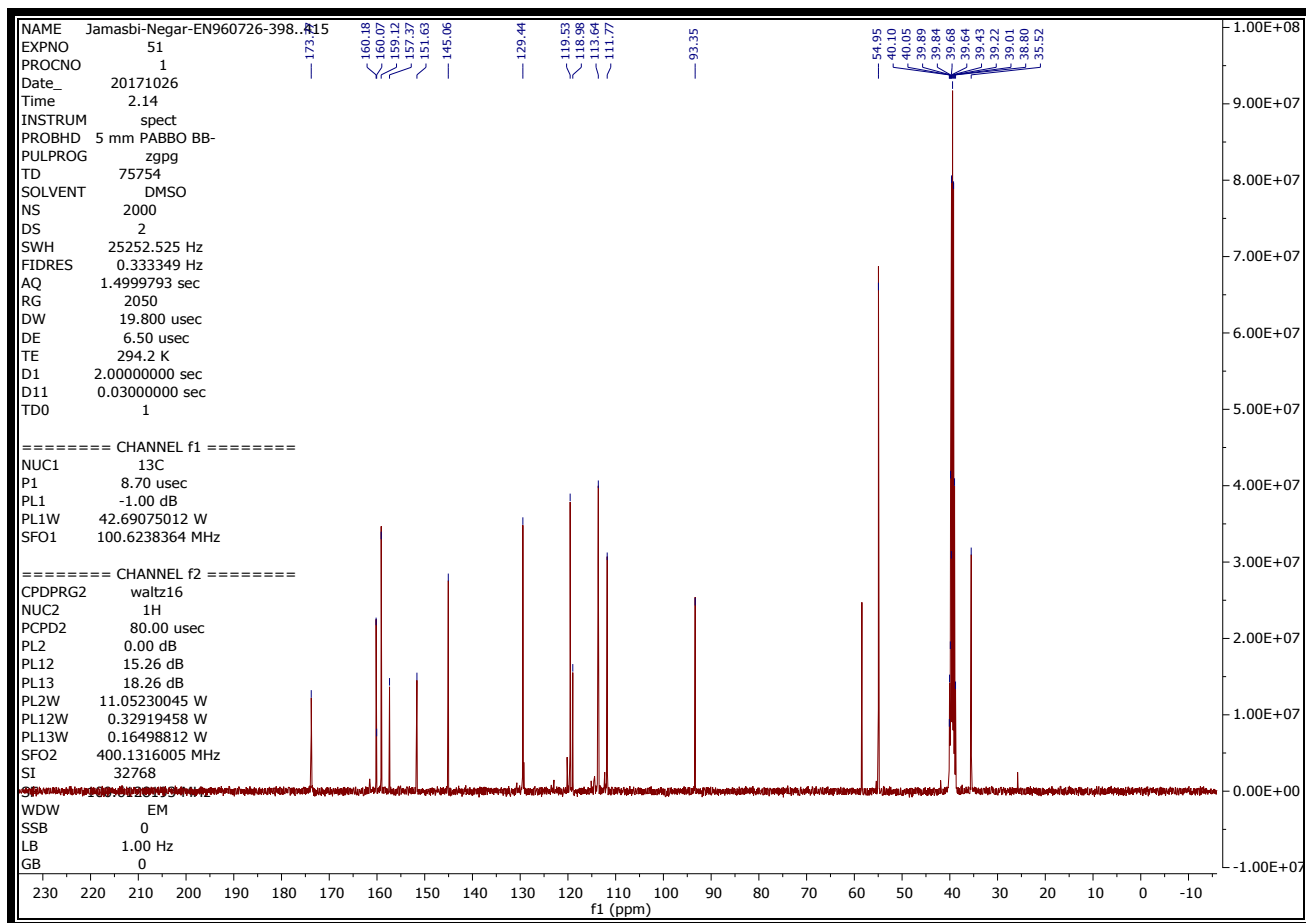

S 13: <sup>13</sup>C-NMR spectrum of 7-Amino-5-(3-methoxyphenyl)-4-oxo-2-thioxo-1,3,4,5-tetrahydro-2H-pyrano[2,3-d]pyrimidine-6-carbonitrile (4x).

**7-Amino-5-(2-chlorophenyl)-4-oxo-2-thioxo-1,3,4,5-tetrahydro-2H-pyrano[2,3-d]pyrimidine-6-carbonitrile (4y).**

White powder; yield 89%; M.P. 240 °C (Dec.); FT-IR (KBr,  $\nu$ ,  $\text{cm}^{-1}$ ): 3450, 3311, 3173, 3065, 2194, 1672, 1572;  $^1\text{H}$  NMR (400 MHz,  $\text{DMSO}-d_6$ ):  $\delta$  (ppm) 4.76 (s, 1H, -CH), 7.33-7.21 (m, 5H, CH-Ph and  $\text{NH}_2$ ), 7.38 (dd,  $J_1=9.2$  Hz,  $J_2=1.6$  Hz, 1H, CH-Ph) 12.45 (s, 1H, NH), 13.67 (brs, 1H, NH);  $^{13}\text{C}$  NMR (100 MHz,  $\text{DMSO}-d_6$ ):  $\delta$  (ppm) 56.93, 92.52, 118.5, 127.4, 127.9, 128.5, 129.4, 130.3, 132.2, 134.8, 152.1, 157.6, 157.9, 160.0, 173.8.

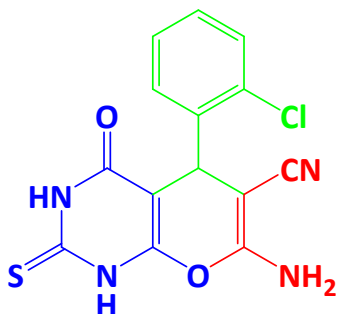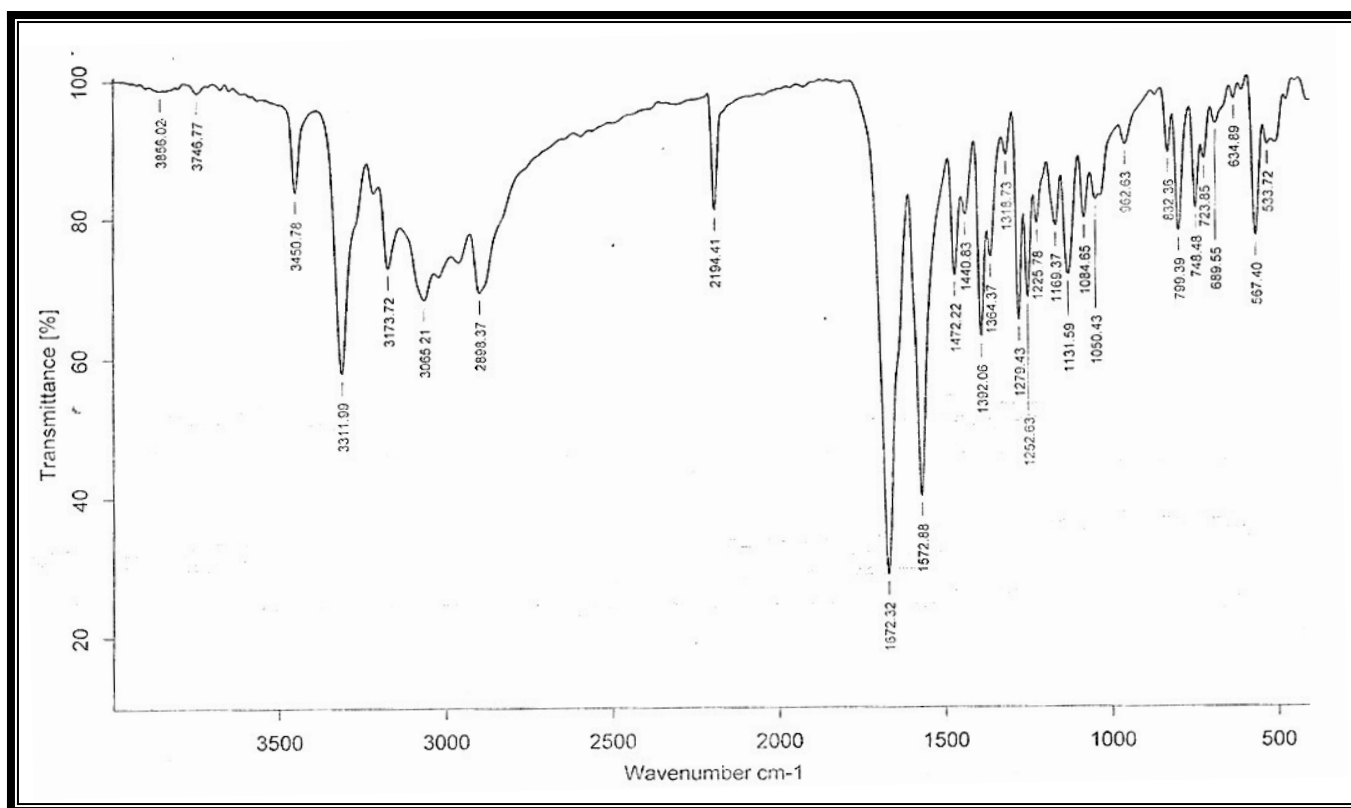

S 14: FT-IR spectrum of 7-Amino-5-(2-chlorophenyl)-4-oxo-2-thioxo-1,3,4,5-tetrahydro-2H-pyrano[2,3-d]pyrimidine-6-carbonitrile (4y).

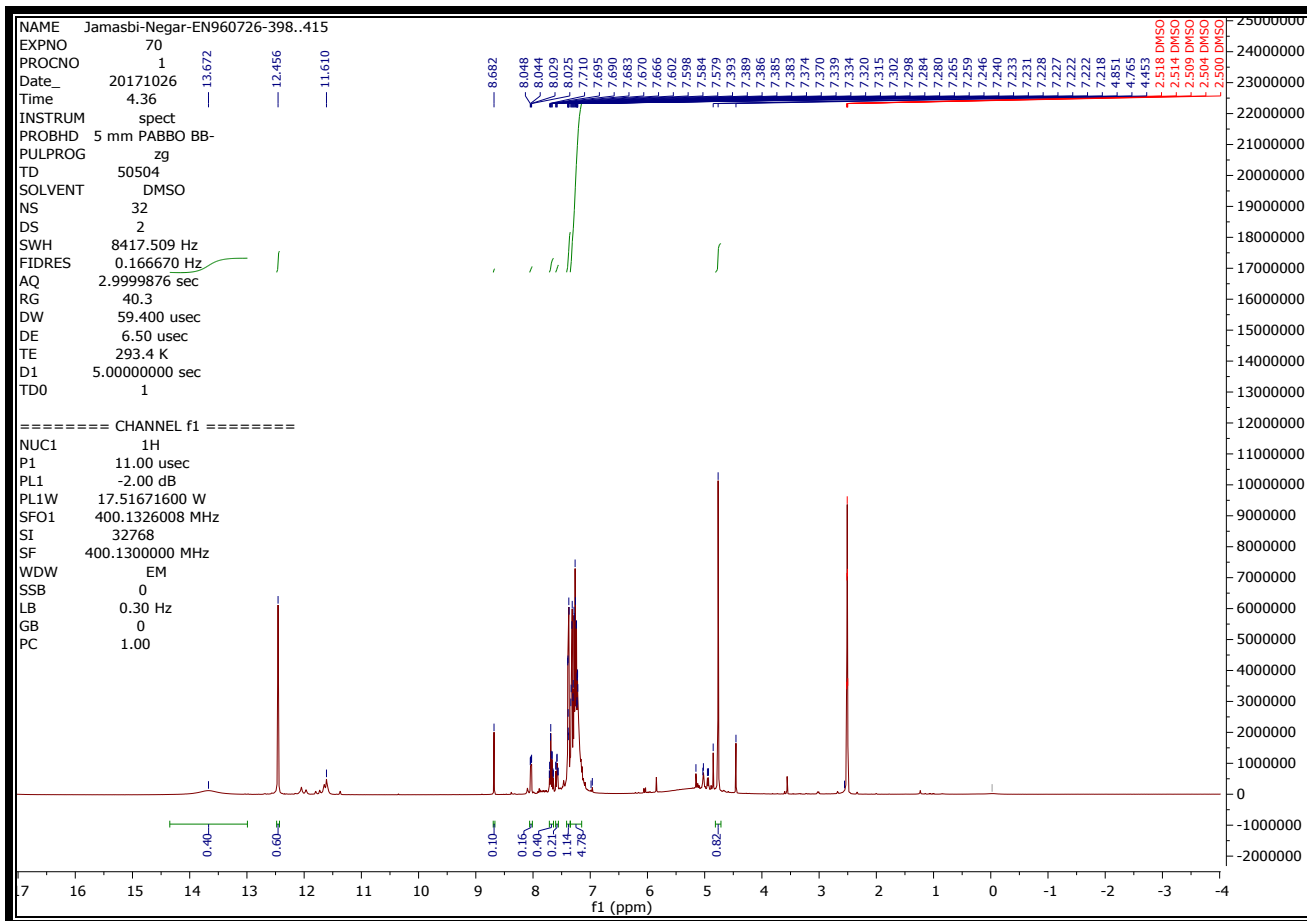

S 15:  $^1\text{H}$ -NMR spectrum of 7-Amino-5-(2-chlorophenyl)-4-oxo-2-thioxo-1,3,4,5-tetrahydro-2H-pyrano[2,3-d]pyrimidine-6-carbonitrile (4y).



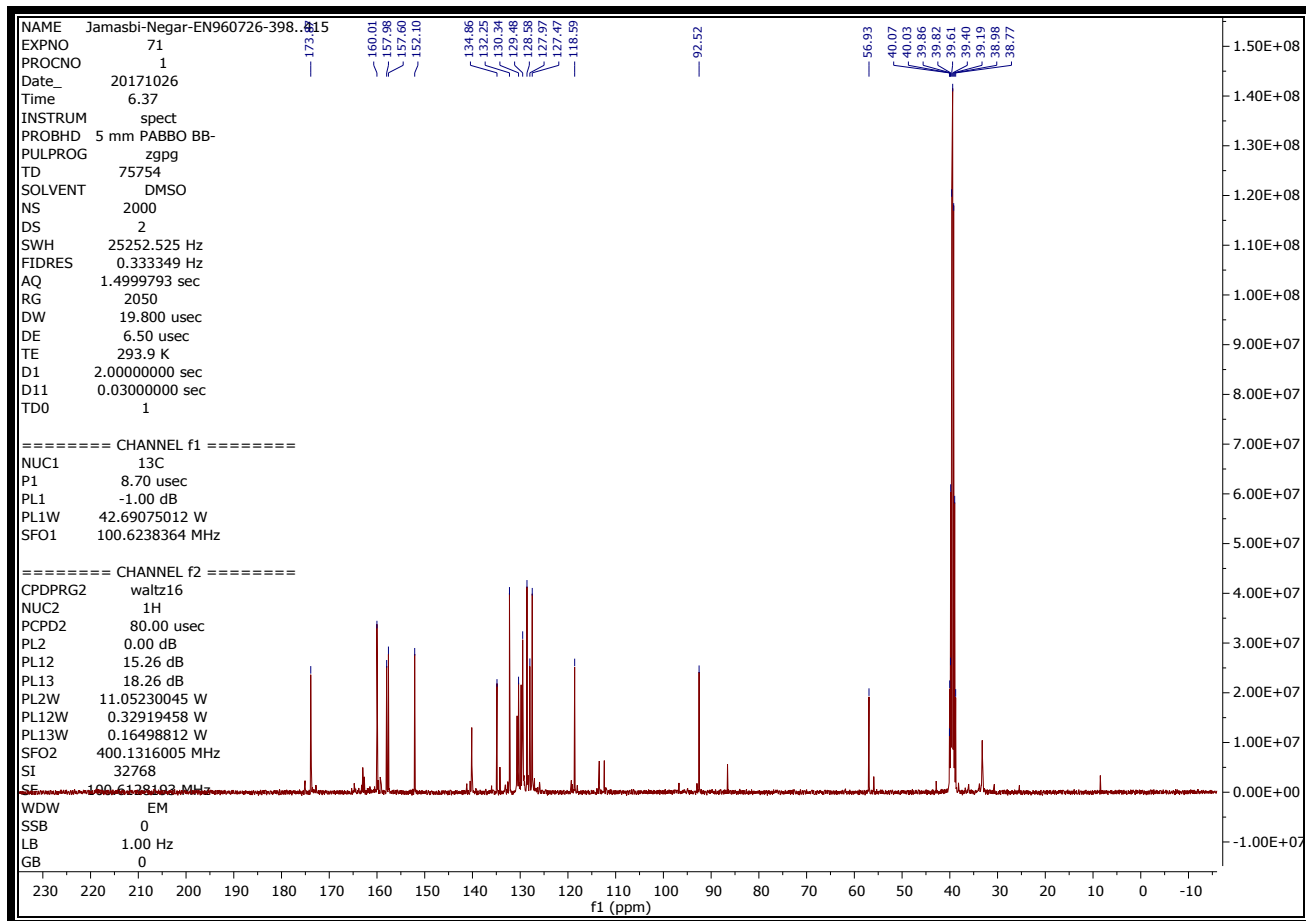

S 16:  $^{13}\text{C}$ -NMR spectrum of 7-Amino-5-(2-chlorophenyl)-4-oxo-2-thioxo-1,3,4,5-tetrahydro-2H-pyrano[2,3-d]pyrimidine-6-carbonitrile (4y).

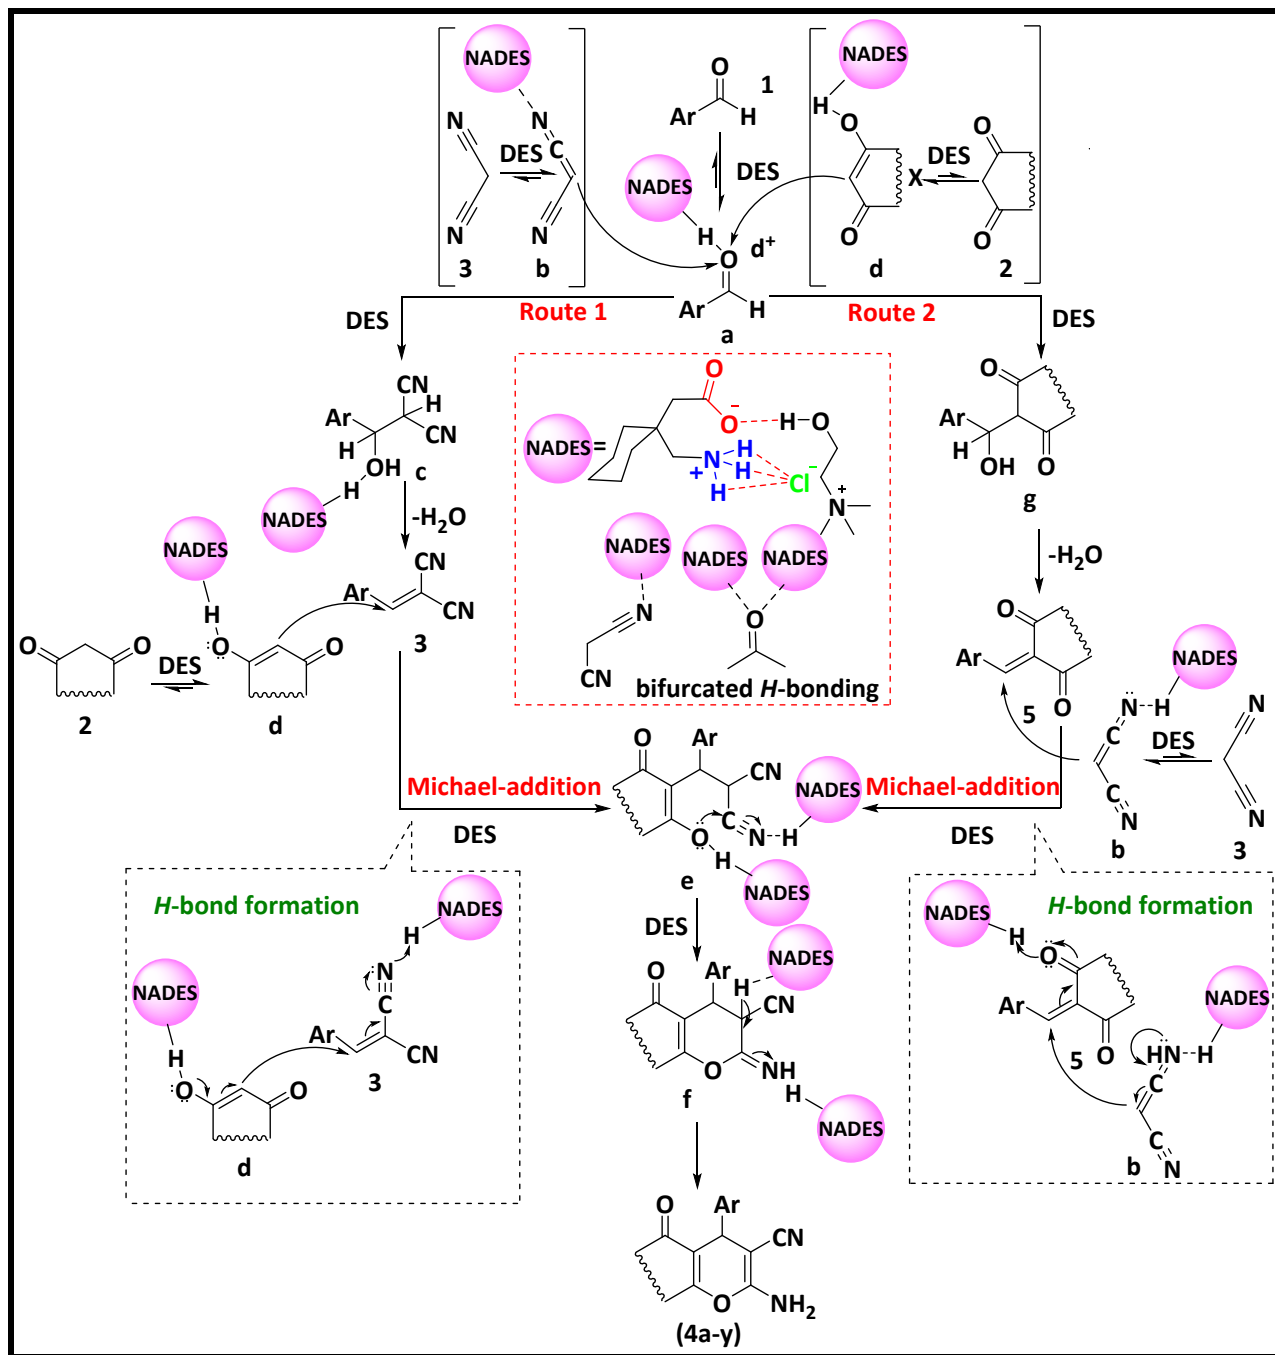

S 17: Plausible mechanism for the synthesis of 4H-pyran derivatives in the presence of [Ch]Cl:Gab NADES.
